# Supplementary material for: Pediatric Acute Kidney Injury in Rwanda: Awareness, Early Detection, and Timely Management to Improve Outcomes, a Multi-Center Mixed Method Study
Source: Research Square preprint supplement (doi:10.21203/rs.3.rs-7754778/v1), 2025-11-10
Supplement: Supplementary file 1 [file 9810e9ab2eba8a094911801f.docx]

**PRE TRAINING ASSESSMENT ON AKI IN CHILDREN MANAGEMENT**

FORM IDENTIFICATION: ----------

**Participant Consent Statement**

**Purpose:**
This pre-test assesses your current knowledge about pediatric Acute Kidney Injury (AKI) before the training program. Your responses will help evaluate the effectiveness of the training and improve AKI management in Rwandan hospitals: Your responses are anonymous and will not affect your employment or training participation, Data will be used only for research purposes, quality improvement and stored securely. Participation is voluntary. You may skip any questions or withdraw at any time. Completing this form implies your consent to use your anonymized responses for research.

**For more information Contact:**
For questions, contact: Dr. Gilbert Rugamba Email: [girugamba@gmail.com](https://mailto:girugamba@gmail.com/) | Phone: +250 786 671 067

**By proceeding, you consent to participate in this pre-test assessment. Sign and by Name initials :**

1. **Demographics**

| Hospital | □ chuk □ muhima □kibagabaga □ kacyiru  □ Kibuye Referral Hospital □ Ruhangeri L2TH □Byumba L2TH |
| --- | --- |
|  | …. |
| Gender | - Female □ Male |
| Education level | - Registered nurse - Medical doctor (general practitioner) - Pediatrician - Others……………. |
| Years of practice | …….. |
| Department | - Pediatric □ neonatology □ Emergency □ HDU/IC U □ ALL □ others ………. |
| Have you had previous AKI lecture/training? | - during graduate training (school) - while working as part of CPD training - never - Other |
| How often have you seen patients with acute kidney injury on the wards in the last 6 months? | - frequently □rarely □ never □ I do not know |
| How often do you think you may have missed acute kidney injury diagnosis on the wards in the last 6 months? | - frequently □rarely □ never □ I do not know |
| How comfortable do you feel managing AKI in chidren ? | - very comfortable □ comfortable □ less comfortable - not comfortable at all |

HDU: high dependent unit, ICU: intensive care unit, CPD: continuous professional development.

# Clinical assessment

**1. Diagnosis of AKI**
A 3-year-old child with a baseline serum creatinine of 0.4 mg/dL presents with vomiting and diarrhea. Current serum creatinine is 0.7 mg/dL, measured twice over 24 hours. Urine output is 0.8 mL/kg/h for the past 6 hours. According to KDIGO criteria, does this child meet the diagnosis of AKI?
**A.** Yes, due to a rise in creatinine by ≥0.3 mg/dL within 48 hours
**B.** Yes, due to urine output <0.5 mL/kg/h for 6 hours
**C.** No, because the creatinine increase is not ≥1.5 times baseline
**D.** No, because both creatinine and urine output criteria are unmet

**2. AKI Classification**
A 10-year-old with leukemia develops oliguria (0.3 mL/kg/h for 18 hours) and a serum creatinine increase from 0.6 mg/dL to 1.5 mg/dL. What KDIGO stage of AKI is this?

**A.** Stage 1 **B.** Stage 2 **C.** Stage 3 **D.** No AKI

**3. Etiologies of Intrinsic AKI**
Which of the following is a *primary intrinsic* cause of pediatric AKI according to KDIGO?
**A.** Dehydration from gastroenteritis
**B.** Posterior urethral valves
**C.** Hemolytic uremic syndrome (HUS)
**D.** Congestive heart failure

**4. Management of AKI**
Which intervention aligns with KDIGO guidelines for managing AKI in a child with fluid overload?
**A.** Immediate administration of IV iodinated contrast for imaging
**B.** Use of loop diuretics to relieve pulmonary edema
**C.** Prophylactic antibiotics to prevent infection
**D.** Restricting fluid intake regardless of volume status

**5. Indications for Dialysis**
According to KDIGO, which scenario is an absolute indication for initiating dialysis in pediatric AKI?
**A.** Serum potassium of 6.5 mEq/L with ECG changes not responding to medical treatment
**B.** Metabolic acidosis (pH 7.30) unresponsive to bicarbonate therapy
**C.** Mild fluid overload with stable blood pressure
**D.** Asymptomatic urea elevation (BUN 60 mg/dL)

Assessment of availability, importance and acceptability of AKI clinical practice guideline

- - 1. **Availability of AKI guideline**

I have previously used AKI guideline  yes  No

If yes  local guideline  international guideline

# Importance of AKI guideline

- - - 1. A guideline on the management of AKI is needed in the hospital

 strongly agree  agree  neutral  disagree  strongly disagree

- - - 1. The guideline will improve the knowledge of health providers about AKI

 strongly agree  agree  neutral  disagree  strongly disagree

- - - 1. This guideline will improve clinical outcomes of AKI patients in our hospital

 strongly agree  agree  neutral  disagree  strongly disagree

- - - 1. The guideline will improve health care service in this hospital

 strongly agree  agree  neutral  disagree  strongly disagree

- - - 1. The guideline will decrease the number of unnecessary transfers to higher level

 strongly agree  agree  neutral  disagree  strongly disagree

# Acceptability of AKI guideline

6. I will follow the guideline if available in the hospital

 strongly agree  agree  neutral  disagree  strongly disagree
