# Supplementary material for: Pediatric Acute Kidney Injury in Rwanda: Awareness, Early Detection, and Timely Management to Improve Outcomes, a Multi-Center Mixed Method Study
Source: Research Square preprint supplement (doi:10.21203/rs.3.rs-7754778/v1), 2025-11-10
Supplement: Supplementary file 1 [file e817dfcd59a3fa9085493d2f.pdf]

# COMPREHENSIVE PEDIATRIC AKI STUDY QUESTIONNAIRE

## SECTION 1: PATIENT IDENTIFICATION AND DEMOGRAPHIC INFORMATION

---

### Hospital Enrolled

- ☐ Kibagabaga District Hospital
- ☐ Muhima District Hospital
- ☐ Kacyiru District Hospital
- ☐ Byumba District Hospital
- ☐ Ruhengeri Level II Teaching Hospital
- ☐ Kibuye Referral Hospital

### Date of Enrollment

yyyy-mm-dd

---

### Data collector Name

- ☐ IRENE
- ☐ JEANNETTE
- ☐ JOY
- ☐ VAINQUEUR
- ☐ Other

### STUDY ID

---

### Date of birth

yyyy-mm-dd

---

### Gender

- ☐ Male
- ☐ Female

### Weight at admission

---

**Height /length in cm**

---

**District of residence**

---

**Sector of Residence**

---

**Social economic categories**

- ☐ UBDEHE CAT 1
- ☐ UBDEHE CAT 2
- ☐ UBDEHE CAT 3
- ☐ UBDEHE CAT 4
- ☐ NOT MENTIONED

**Insurance status**

- ☐ Mutuelle de Santé
- ☐ ☐ RAMA
- ☐ ☐ MMI
- ☐ ☐ Private insurance
- ☐ ☐ No insurance
- ☐ ☐ Other:

**Date of admission**

yyyy-mm-dd

---

---

**Date of AKI Diagnosis**

---

**Time of Admission (24 hour format)**

---

**Mode of arrival**

- ☐ ☐ Self-referral
- ☐ ☐ Health center referral
- ☐ ☐ District hospital referral
- ☐ ☐ Other hospital referral
- ☐ ☐ Emergency transfer
- ☐ Counter referral
- ☐ Others

**Primary complaint:**

- ☐ Fever
- ☐ Vomiting
- ☐ Diarrhea
- ☐ Reduced urine outputs
- ☐ Generalised body swelling / edema
- ☐ abdominal swelling
- ☐ facial swelling
- ☐ lower limb swelling
- ☐ Difficulty Breathing
- ☐ Altered Consciousness/ mental status
- ☐ Seizures
- ☐ cough
- ☐ chest pain
- ☐ hemoptisis
- ☐ abdominla pain
- ☐ muscle weakness
- ☐ generalized body weakness
- ☐ headache
- ☐ dark urine
- ☐ vomiting blood
- ☐ epistaxis
- ☐ Others

**Associated conditions**

- ☐ pneumonia
- ☐ malaria
- ☐ acute gastroenteritis
- ☐ sepsis
- ☐ meningitis
- ☐ meningoencephalitis
- ☐ multiorgan dysfunction
- ☐ trauma
- ☐ traditional medication use
- ☐ shock (septic, cardiogenic )
- ☐ shock Hypovolemic
- ☐ nephrotic/ nephritic syndrome
- ☐ acute glomerulonephritis
- ☐ Pharyngitis
- ☐ Others

**Comorbidities**

- ☐ Diabetes mellitus
- ☐ congenital renal anomalies
- ☐ hypertension
- ☐ malignancies
- ☐ sickle cell disease
- ☐ heart failure
- ☐ severe malnutrition
- ☐ liver failure
- ☐ congenital heart disease
- ☐ hemophilia
- ☐ Others

**Duration of Symptoms Before Seeking Care**

• Duration of symptoms before first healthcare contact: \_ days

---

Vitals sign on admission

---

**Temperature**

---

**Heart rate (beats/min )**

---

**Respiratory rate: \_ breaths/min**

---

**Blood pressure: / mmHg**

---

**• Oxygen saturation: \_% on ☐ Room air ☐ Oxygen support**

---

**Hydration status**

- ☐ Well hydrated
- ☐ Some dehydration
- ☐ Severe dehydration
- ☐ not mentioned

**signs of dehydration**

- ☐ ☐ Dry mucous membranes
- ☐ ☐ Sunken eyes
- ☐ ☐ Reduced skin turgor
- ☐ ☐ Delayed capillary refill (>2 seconds)
- ☐ ☐ Cool extremities
- ☐ ☐ None of the above

**Urine output Assessment**

- ☐ ☐ Normal (>1 ml/kg/hour)
- ☐ ☐ Reduced (0.5-1 ml/kg/hour)
- ☐ ☐ Oliguria (<0.5 ml/kg/hour)
- ☐ ☐ Anuria (<0.3 ml/kg/hour or no urine for >12 hours)
- ☐ Not mentioned

**Method of urine measurement**

- ☐ □ Urinary catheter
- ☐ □ Urine collection bag
- ☐ □ Diaper weighing
- ☐ □ Estimated by caregiver
- ☐ □ Not measured

Clinical Signs and Symptoms

---

**Neurological status**

- ☐ □ Alert
- ☐ □ Responds to voice
- ☐ □ Responds to pain
- ☐ □ Unresponsive
- ☐ □ Not assessed/ mentioned

• **Glasgow Coma Scale: E V M Total:**

---

**Previous hospital admissions**

- ☐ □ Yes
- ☐ □ No

☐ □ Unknown If yes, reason and date: \_

---

• **Previous episodes of AKI**

- ☐ □ Yes
- ☐ □ No

☐ □ Unknown If yes, reason and date: \_

---

**AKI Risk Factors mentioned**

- ☐ Recent infection
- ☐ Recent surgery
- ☐ Recent trauma
- ☐ Exposure to nephrotoxic agents in the past 14 days: NSAIDs, Aminoglycosides, Contrast media, Traditional medicines
- ☐ None of above

**Unknown If yes, reason describe and date: \_**

---

**Previous baseline creatinine available**

- ☐ Yes
- ☐ No

**If yes, value: \_ mg/dl or \_  $\mu$ mol/L, Date: //\_ \_**

---

**Admission laboratory values**

---

**Amount**

---

**Unit of measurement**

---

**Was it measured**

---

**Serum Creatine**

---

---

---

- ☐ Yes ☐ Not mentioned

**Blood glycemia**

---

---

---

☐ Yes ☐ Not mentioned

**Bicarbonate**

---

---

---

☐ Yes ☐ Not mentioned

**Chloride**

---

---

---

☐ Yes ☐ Not mentioned

**ALT**

---

---

---

☐ Yes ☐ Not mentioned

**Phosphorus**

---



---

---

☐ Yes ☐ Not mentioned

**Blood urea nitrogen (BUN)**

---

---

---

☐ Yes ☐ Not mentioned

**Serum albumin**

---

---

---

☐ Yes ☐ Not mentioned

**AST**

---

---

---

☐ Yes ☐ Not mentioned

**Sodium**

---

---

---

☐ Yes ☐ Not mentioned

**C-reactive protein**

---

---

---

☐ Yes ☐ Not mentioned

**Potassium**

---

---

---

☐ Yes ☐ Not mentioned

**Hemoglobin**

---

---

---

☐ Yes ☐ Not mentioned

**Calcium**

---

---

---

☐ Yes ☐ Not mentioned

**LDH**

---

---

---

☐ Yes ☐ Not mentioned

**White Blood Cell count**

---

---

---

☐ Yes ☐ Not mentioned

**Platelet count**

---

---

---

☐ Yes ☐ Not mentioned

**Malaria test**

- ☐ Positive
- ☐ Negative
- ☐ Not done

**Blood culture**

- ☐ Positive
- ☐ Negative
- ☐ Not done

If positive, organism: \_

---

**Urine dipstick performed**

- ☐ Yes
- ☐ no

**VALUES**

---

**Value obtained**

---

**Blood**

---

- ☐ Negative   ☐ 3+   ☐ Trace   ☐ 2+   ☐ 1+   ☐ 4+

**Glucose**

---

- ☐ Negative   ☐ 3+   ☐ Trace   ☐ 2+   ☐ 1+   ☐ 4+

**Nitrites**

---

- ☐ Negative   ☐ 3+   ☐ Trace   ☐ 2+   ☐ 1+   ☐ 4+

**Leukocytes**

---

☐ Negative ☐ 3+ ☐ Trace ☐ 2+ ☐ 1+ ☐ 4+

**Protein**

---

☐ Negative ☐ 3+ ☐ Trace ☐ 2+ ☐ 1+ ☐ 4+

**Urine microscopy**

☐ Yes  
☐ No

If yes, findings: \_

---

**Ultrasound performed**

☐ yes  
☐ no  
☐ not mentioned

findings

---

**other imaging**

☐ Chest X ray  
☐ CT Scan  
☐ Other imaging  
☐ none

if other specify

---

**• AKI diagnosed based on**

☐ ☐ Increase in serum creatinine by  $\geq 0.3$  mg/dl within 48 hours ☐ Increase in serum creatinine to  $\geq 1.5$  times baseline within 7 days

☐ ☐ Urine output  $< 0.5$  ml/kg/hour for 6 hours

☐ Multiple criteria

☐ Not mentioned

**AKI Staging at Diagnosis (KDIGO)**

- ☐ ☐ Stage 1: SCr 1.5-1.9 times baseline OR  $\geq 0.3$  mg/dl increase OR urine output  $< 0.5$  ml/kg/h for 6-12h
- ☐ ☐ Stage 2: SCr 2.0-2.9 times baseline OR urine output  $< 0.5$  ml/kg/h for  $\geq 12$ h
- ☐ ☐ Stage 3: SCr 3.0 times baseline OR increase to  $\geq 4.0$  mg/dl OR initiation of RRT OR urine output  $< 0.3$  ml/kg/h for  $\geq 24$ h OR anuria for  $\geq 12$ h
- ☐ ☐ no staging done

**Time of AKI Diagnosis**

- ☐ • AKI present on admission
- ☐ • AKI developed during hospitalization
- ☐ • not specified

If yes, days after admission: \_

---

**Probable Etiology of AKI**

- ☐ ☐ Pre-renal (hypovolemia, shock, heart failure)
- ☐ ☐ Intrinsic renal: ☐ Acute tubular necrosis ☐ Glomerulonephritis ☐ Hemolytic uremic syndrome ☐ Interstitial nephritis
- ☐ ☐ Post-renal (obstruction) ☐ Multifactorial ☐ Unknown
- ☐ NOT MENTIONED

**Initial management**

- ☐ Fluid resuscitation
- ☐ Diuretics used
- ☐ Antibiotics initiated
- ☐ Needed mechanical ventilation
- ☐ Vasopressors/inotropes
- ☐ None of above mentioned

if above provide details (Type: ☐ Normal saline ☐ Ringer's lactate ☐ Other: \_ o Volume in first 24 hours: \_ ml/kg • Diuretics used: ☐ Yes ☐ No If yes: o Type: ☐ Furosemide ☐ Other: \_ o Initial dose: \_ mg/kg o Route: ☐ IV ☐ Oral

---

Which medication used

---

**AKI-Specific Management**

- ☐ •Nephrotoxic medication discontinued
- ☐ •Dose adjustments for medications
- ☐ •Nutritional support
- ☐ Not mentioned

**Renal Replacement Therapy (RRT) indicated**

- ☐ Yes
- ☐ No
- ☐ Not mentioned

**If yes**

- ☐ RRT received
- ☐ If not received despite indication, reason

**If RRT Received state o Type:** ☐ Peritoneal dialysis ☐ Hemodialysis ☐ CRRT **o Date initiated:** // \_ o **Duration:** \_ days

---

**If not received state the reason**

---

Discharge Details

---

**• Date of discharge/death**

yyyy-mm-dd

---

---

**Discharge status**

- ☐ Alive
- ☐ Deceased
- ☐ Referred to another hospital

**If deceased (primary cause of death and contributing factor)**

---

**Was AKI a direct or contributing cause**

- ☐ Yes
- ☐ NO
- ☐ Unknown

**Final diagnosis (related to AKI)**

---

**Final serum creatinine**

---

**Renal recovery status**

- ☐ ☐ Complete recovery ( $\text{SCr} \leq \text{baseline}$ )
- ☐ ☐ Partial recovery ( $\text{SCr} < \text{diagnosis level but} > \text{baseline}$ )
- ☐ ☐ No recovery ( $\text{SCr} \geq \text{diagnosis level}$  or still requiring RRT)

**Discharge medications**

---

**Nephrology follow up arranged**

- ☐ Yes
- ☐ No
